# Supplementary material for: Atypical Mucin Expression Predicts Worse Overall Survival in Resectable Pancreatic Ductal Adenocarcinoma
Source: J Immunol Res. 2022 Jul 21;2022:7353572. doi: 10.1155/2022/7353572 (PMC9334048; doi:10.1155/2022/7353572)
Supplement: Supplementary Materials — Supplementary Figure 1 displayed high-power-field images of IHC staining results in the FUSCC cohort. Supplementary Table 1 displayed mucins' expression in correlation to PDAC patients' OS in the QCMG cohort. Supplementary Table 2 displayed univariate and multivariate analyses of OS in the FUSCC cohort. [file 7353572.f1.zip]

Archive with 4 entries (4 files):
- Supplementary Figure 1.doc
- Supplementary Materials.doc
- Supplementary Table 1.doc
- Supplementary Table 2.doc
